1 **Comparison of Illumina MiSeq and the Ion Torrent PGM and S5 platforms for**  
2 **whole-genome sequencing of picornaviruses and caliciviruses**

3

4 **Running Title: Comparison of NGS platforms for sequencing RNA viruses**

5

6 Rachel L. Marine<sup>a#</sup>, Laura C. Magaña<sup>ab\*</sup>, Christina J. Castro<sup>ab</sup>, Kun Zhao<sup>a</sup>, Anna M.  
7 Montmayeur<sup>c</sup>, Alexander Schmidt<sup>d</sup>, Marta Diez-Valcarce<sup>ab</sup>, Terry Fei Fan Ng<sup>a</sup>, Jan  
8 Vinjé<sup>a</sup>, Cara C. Burns<sup>a</sup>, W. Allan Nix<sup>a</sup>, Paul A. Rota<sup>a</sup>, M. Steven Oberste<sup>a</sup>

9

10 <sup>a</sup> Division of Viral Diseases, Centers for Disease Control and Prevention, Atlanta, GA,  
11 USA

12 <sup>b</sup> Oak Ridge Institute for Science and Education, Oak Ridge, Tennessee, USA

13 <sup>c</sup> Cherokee Nation Government Solutions, Tampa, FL, USA, contracting agency to the  
14 Division of Viral Diseases, Centers for Diseases Control and Prevention, Atlanta, GA,  
15 USA

16 <sup>d</sup> IHRC, Inc., Atlanta, Georgia, USA, contracting agency to the Division of Viral  
17 Diseases, Centers for Diseases Control and Prevention, Atlanta, GA, USA

18

19 #Address correspondence to Rachel L. Marine, [rmarine@cdc.gov](mailto:rmarine@cdc.gov).

20 \*Present address: School of Public Health, University of California, Berkeley, California,  
21 USA.

22

23 Word Count: 229 (Abstract), 2979 (Intro, Results and Discussion); 4294 (including  
24 Methods)

25 The findings and conclusions in this report are those of the author(s) and do not  
26 necessarily represent the official position of the Centers for Disease Control and  
27 Prevention.

28 **ABSTRACT**

29 Next-generation sequencing is a powerful tool for virological surveillance. While  
30 Illumina® and Ion Torrent® sequencing platforms are used extensively for generating  
31 viral RNA genome sequences, there is limited data comparing different platforms. We  
32 evaluated the Illumina MiSeq, Ion Torrent PGM and Ion Torrent S5 platforms using a  
33 panel of sixteen specimens containing picornaviruses and human caliciviruses  
34 (noroviruses and sapoviruses). The specimens were processed, using combinations of  
35 three library preparation and five sequencing kits, to assess the quality and  
36 completeness of assembled viral genomes, and an estimation of cost per sample to  
37 generate the data was calculated. The choice of library preparation kit and sequencing  
38 platform was found to impact the breadth of genome coverage and accuracy of  
39 consensus viral genomes. The Ion Torrent S5 outperformed the older Ion Torrent PGM  
40 platform in data quality and cost, and generated the highest proportion of reads for  
41 enterovirus D68 samples. However, indels at homopolymer regions impacted the  
42 accuracy of consensus genome sequences. For lower throughput sequencing runs (i.e.,  
43 Ion Torrent 510 or Illumina MiSeq Nano V2), the cost per sample was lower on the  
44 MiSeq platform, whereas with higher throughput runs (Ion Torrent 530 or Illumina MiSeq  
45 V2) the cost per sample was comparable. These findings suggest that the Ion Torrent  
46 S5 and Illumina MiSeq platforms are both viable options for genomic sequencing of  
47 RNA viruses, each with specific advantages and tradeoffs.

## 48 **INTRODUCTION**

49 Conventional Sanger sequencing has been the gold standard for genomic analysis of  
50 pathogens in public health laboratories for over three decades. However, the expansion  
51 of next-generation sequencing (NGS) technologies has increased demand for high-  
52 throughput sequencing of genomes at a lower cost (1). NGS has been used extensively  
53 for routine surveillance and outbreak investigation of numerous viral RNA pathogens.  
54 The exponential growth of genomic information generated for important pathogens has  
55 provided increased resolution for molecular epidemiology, as well as information  
56 necessary for the design of clinical assays and therapeutics (2-5). NGS methods are  
57 also useful for identifying pathogens in syndromes where etiologies often remain  
58 unknown (e.g., encephalitis, febrile illness), complementing or even replacing current  
59 diagnostic methods (2, 6, 7).

60

61 Over the past several years, the suppliers of high-capacity short-read sequencers have  
62 been reduced to two manufacturers: Illumina (sequencing-by-synthesis technology) and  
63 Thermo Fisher Scientific (Ion Torrent semi-conductor sequencing technology) (3).  
64 Illumina platforms have been used to generate nearly 90% of NGS data worldwide  
65 (<https://www.wired.com/2016/02/gene-sequencing-goliath-wants-get-bigger-still/>).  
66 Illumina produces several benchtop and production-scale sequencers with data outputs  
67 varying from 1.2 gigabases (Gb) to 6 terabases (Tb). In microbial research laboratories,  
68 the MiSeq platform is convenient for sequencing small microbial genomes (i.e., viruses  
69 and bacteria), compared to the larger-output Illumina platforms, that are more  
70 appropriate for eukaryotic genomes or very large studies, due to the balance of

71 system/reagent costs and required sequencing depth (8-10). Similarly, the Ion Torrent  
72 technology is available in several models, producing data outputs from 30 megabases  
73 (Mb) to 25 Gb per chip. The Ion Torrent PGM, and newer systems (Ion Torrent S5, S5  
74 XL, and GeneStudio S5, S5 Plus and S5 Prime) are also commonly used for microbial  
75 targeted-amplicon and whole-genome sequencing (8, 11-13).

76  
77 Despite the extensive use of these platforms worldwide, there are limited studies  
78 providing a comprehensive comparison of yield and quality of generated data, as well  
79 as cost per sample to obtain complete viral RNA genomes. Comparing these NGS  
80 platforms is challenging due to their unique sequencing chemistries, resulting in vastly  
81 different quality score estimates and error profiles for the resulting data (14-16). Direct  
82 comparison of samples sequenced using both platforms is the ideal strategy to evaluate  
83 the advantages and limitations. Previous studies have mostly focused on 16S ribosomal  
84 genes or whole-genome sequencing of bacterial genomes on Sanger, Pacific  
85 BioSciences, 454 GS Junior, Ion Torrent, and Illumina platforms (8, 13, 17-19). In this  
86 study we sequenced a panel of 16 specimens known to contain enterovirus (EV) D68,  
87 poliovirus, norovirus, parechovirus and/or sapovirus using sequencing kits of varying  
88 output on the Illumina MiSeq, Ion Torrent PGM, and Ion Torrent S5 platforms.

89

## 90 **MATERIALS AND METHODS**

### 91 **Sample Preparation**

92 Sixteen samples were selected for the platform comparison: twelve clinical specimens,  
93 including nasopharyngeal (NP) swabs and stool specimens, and four cell culture  
94 isolates that were spotted on Whatman FTA cards. The chosen specimens contained  
95 picornaviruses (samples EV-D68-1 through -4 and Polio-5 through -8), caliciviruses  
96 (samples Noro-9 through -12 and Sapo-15 and Sapo-16), or mixtures of both (samples  
97 Sapo-13; Parecho-13 and Sapo-14; Parecho-14) (Table S1). For NP swabs and stool  
98 specimens, samples were first clarified by centrifugation at 15,300 x g for 10 min. To  
99 remove host cellular debris and bacteria, 160 µl of the clarified supernatant was filtered  
100 through a sterile 0.45 µM Ultrafree-MC HV filter (EMD Millipore, Billerica, MA USA) by  
101 centrifugation at 3800 x g for 5 min at room temperature. Resulting filtrates were treated  
102 with Turbo DNase (Thermo Fisher Scientific, Carlsbad, CA USA), Baseline Zero DNase  
103 (Epicentre, Madison, WI USA), and RNase A (Roche, Pleasanton, CA USA) for 1 h at  
104 37°C to degrade free nucleic acids. For all specimens, nucleic acids were extracted  
105 using the QIAamp Viral RNA Mini Kit (Qiagen, Germantown, MD USA) with optional on-  
106 column DNase treatment according to the manufacturer's instructions (no carrier RNA)  
107 and eluted using 60 µl of Qiagen buffer AVE.

108

### 109 **Reverse Transcription and Random Amplification**

110 Samples were processed using sequence-independent single-primer amplification  
111 (SISPA) (20, 21). First, viral RNA was reverse-transcribed using SuperScript IV reverse  
112 transcriptase (Thermo Fisher Scientific) and a 28-base primer consisting of a 3' end with  
113 eight random nucleotides (N1\_8N; CCTTGAAGGCGGACTGTGAGNNNNNNN).

114 Second-strand extension was performed using Klenow 3' → 5' exo<sup>-</sup> fragment (New  
115 England BioLabs, Ipswich, MA USA). Double-stranded cDNA was amplified using  
116 AmpliTaq Gold polymerase (Thermo Fisher Scientific) and N1 primer  
117 (CCTTGAAGGCGGACTGTGAG) under the following PCR conditions: 95°C for 5 min, 5  
118 cycles of [95°C for 1 min, 59°C for 1 min, and 72°C for 1.5 min], followed by 25 cycles of  
119 [95°C for 30 sec, 59°C for 30 sec, and 72°C for 1.5 min with an incremental increase in  
120 the extension time of 2 sec per cycle]. Amplification was verified using the TapeStation  
121 2200 (Agilent Technologies, Santa Clara, CA USA) prior to Agencourt AMPure XP bead  
122 purification (Beckman Coulter, Brea, CA USA; 1.8X ratio). Purified DNA was quantified  
123 using the Qubit dsDNA BR Assay kit (Thermo Fisher Scientific).

124

## 125 **Library Preparation and Sequencing**

126 Sample dilution and library construction were performed with halved reactions according  
127 to the manufacturer's instructions for the three library preparation kits evaluated:  
128 Nextera XT DNA Library Prep Kit (Illumina, San Diego, CA USA) and KAPA HyperPlus  
129 Kit (Roche) for Illumina sequencing, and the KAPA DNA Library Preparation Kit for Ion  
130 Torrent sequencing. Enzymatic shearing (included as part of the KAPA HyperPlus Kit)  
131 was not performed since cDNA fragments produced after SISPA are small enough for  
132 input directly into library construction. Individual barcoded libraries were visualized on  
133 the TapeStation 2200 before AMPure XP bead cleanup (1.8X ratio). Purified libraries  
134 were quantified prior to pooling using the LabChip GX (PerkinElmer, Waltham, MA  
135 USA) for Nextera XT libraries and KAPA libraries sequenced on the Ion Torrent S5,

136 whereas KAPA HyperPlus libraries and libraries sequenced on the Ion Torrent PGM  
137 platform were quantified by qPCR using the NEBNext Library Quant Kit for Illumina  
138 (New England BioLabs) or the KAPA Library Quantification Kit for Ion Torrent platforms  
139 (Figure 1). Multiplex Illumina libraries were sequenced by using MiSeq 500v2 and Nano  
140 500v2 kits (2 x 250 basepair (bp) paired-end runs). The Ion Torrent PGM libraries were  
141 prepared using the IC 200 kit for Ion Chef (Thermo Fisher Scientific) and sequenced on  
142 the Ion Torrent PGM using the 316 and 318 semi-conductor sequencing chips, while the  
143 Ion Torrent S5 libraries were prepared using the “Ion 510™ & Ion 520™ & Ion 530™”  
144 for Ion Chef Kit for 400 base-read libraries and sequenced on the Ion Torrent S5 using  
145 an Ion 510 semi-conductor sequencing chip (Thermo Fisher). For reporting of results  
146 and discussion, the eight dataset names are abbreviated as follows: PD6 and PD8 for  
147 library preparation with the KAPA DNA Kit and sequencing on an Ion Torrent PGM 316  
148 v2 chip and 318 v2 chip, respectively; MKN and MK5 for library preparation with the  
149 Kapa HyperPlus Kit and sequencing on an Illumina Nano 500 v2 run and Illumina 500  
150 v2 run, respectively; MNN and MN5 for library preparation with the Nextera XT Kit and  
151 sequencing on an Illumina Nano 500 v2 run and Illumina 500 v2 run, respectively; and  
152 SDG and SDS for library preparation with the KAPA DNA Kit and sequencing on an Ion  
153 Torrent S5 510 chip. The S5 datasets are distinguished by whether the libraries were  
154 size-selected using E-Gel SizeSelect II gels (SDG dataset, 300 bp; Invitrogen,  
155 Carlsbad, CA USA) or purified using standard AMPure XP bead cleanup (SDS) prior to  
156 quantification and chip loading (Figure 1).

157



## 158 **Viral Genome Analysis**

159 Sequencing data were processed using a custom viral bioinformatics pipeline (VPipe,  
160 [vpipe@cdc.gov](mailto:vpipe@cdc.gov)), accessible to partner public health researchers through the CDC  
161 SAMS partner portal (<https://sams.cdc.gov/>). Human reads were identified and removed  
162 through read mapping to the human genome (h19) using bowtie2 (22). Adaptors, primer  
163 sequences, and low-quality bases (phred score threshold of 20) were trimmed from the  
164 raw reads, followed by removal of duplicate reads. Filtered datasets were assembled  
165 using SPAdes v.3.7 (23) with multiple kmer lengths and settings specific for either  
166 Illumina or Ion Torrent datasets. Resulting contigs were compared to the NCBI non-  
167 redundant nucleotide database and an in-house database of viral sequences using  
168 blastn and blastx (24). Geneious v.11.1.2 (25) (BioMatters, Newark, NJ USA) was used  
169 to map sequencing reads to their respective contigs, using the map-to-reference tool  
170 with sensitivity set to low/fastest with a fine tuning of three iterations. Reference  
171 recruitments were manually evaluated for accuracy and trimmed to produce the final  
172 consensus sequence generated by *de novo* assembly. For each sample, consensus  
173 genomes from all eight datasets were aligned to generate the longest consensus  
174 sequence. This “master” consensus provided a consistent reference for performing a  
175 second reference-based recruitment for calculating the proportion of target reads and  
176 coverage statistics. For samples with fewer target reads (EV-D68-1 through 4, and  
177 Sapo-16) the closest genome in GenBank was used as the master consensus (Table  
178 S2). The filtered fastq files for all datasets have been submitted to the NCBI SRA  
179 database (BioProject PRJNA550105).

180

## 181 **Statistics**

182 To assess differences in the proportion of sequences removed during quality control  
183 filtering between samples/datasets, a generalized linear model was fitted with the SAS  
184 proc glimmix procedure (SAS Institute, Cary, NC). Beta distribution was utilized with  
185 logit link function because read proportion is a percentage variable (26). The response  
186 variable was fitted on observed variables “virus”, “dataset”, and “library kit”. Variable  
187 “dataset” is nested within variable “library kit” since each dataset (produced on a given  
188 sequencing technology) can be only used with a specific compatible library preparation  
189 protocol (variable “library kit”). Least-square means were calculated using Tukey  
190 comparisons to account for multiple comparisons across different scenarios (27). To  
191 compare genome coverage across datasets, Pearson’s correlation coefficient was  
192 computed using JMP statistical software (version 9.0.0; SAS, Cary, NC, USA) (28). EV-  
193 D68 datasets were not considered for the correlation analysis due to low coverage  
194 across multiple datasets.

195

## 196 **Cost Analysis Calculation**

197 The cost per sample was calculated for sequencing preparation workflows performed in  
198 this study, plus an estimate of the cost per sample for sequencing on an Ion Torrent S5  
199 530 chip (which has higher sequencing data output than the S5 510 chips used in this  
200 study). The pricing of all kits and consumables utilized from pretreatment and extraction  
201 through sequencing was included, taking into account the total number of samples  
202 which could be processed by a given kit and the multiplexing level for the sequencing

203 run considered. For consistency, the LabChip GX HS assay was used for calculating  
204 the cost of library quantitation for all preparations, despite using both LabChip GX and  
205 qPCR-based quantitation methods for this study. Sample and reagent shipment,  
206 equipment, and personnel costs were not considered.

207

## 208 **RESULTS**

### 209 **Sequencing Yield**

210 The eight datasets analyzed were sequenced using five different chips/kits which vary in  
211 their advertised read output (Figure 1, Table S3): Ion Torrent PGM 316 v2 chip (PD6),  
212 Ion Torrent PGM 318 v2 chip (PD8), Ion Torrent S5 510 chip (SDS, SDG), Illumina  
213 MiSeq 500v2 Nano kit (MKN, MNN), and standard Illumina MiSeq 500v2 kit (MK5,  
214 MN5). Total sequencing yield per run (Table S4) was within the output ranges claimed  
215 by manufacturers, with two exceptions. For the Ion Torrent PGM runs (PD6 and PD8),  
216 where the total yield was roughly a third of that expected, decreased yields were likely  
217 due to less efficient chip loading and lower proportions of clonal and useable reads with  
218 the PGM platform relative to the newer S5 platform (Table S5). Lower yields were also  
219 observed for Illumina libraries prepared using the KAPA HyperPlus Kit (MKN, MK5)  
220 compared to the Nextera XT kit (MNN, MN5). This was attributed to lower clustering  
221 densities on the Illumina MiSeq (MKN, 478K/mm<sup>2</sup> and MK5, 439K/mm<sup>2</sup> vs. MNN,  
222 1120K/mm<sup>2</sup> and MN5, 1046K/mm<sup>2</sup>), despite using qPCR for library quantitation, which  
223 is thought to provide more accurate estimates of sample concentration than  
224 electrophoresis-based methods (29).

225

## 226 **Data Yields after Quality Control**

227 For all libraries, prefiltering of raw fastq files consisted of removal of host (human)  
228 sequences, trimming of low quality bases and adapters, and removal of short (<50 bp)  
229 and duplicate reads. After quality control, 17.3-46.1% of total reads were retained per  
230 library (Table S4). The proportion of reads removed during each step of the quality  
231 control filtering varied greatly by virus and sample (Figure 2). A large proportion of host  
232 reads (56.5-98.4%) were removed for EV-D68 samples (NP swabs), regardless of the  
233 library preparation kit and sequencing platform used (Figure 2A, Table S6,  $p < 0.0001$ ).  
234 There was also a significant difference in the proportion of host reads removed for stool  
235 specimens (samples Noro-9 through Sapo-16) compared to cell culture specimens  
236 (samples Polio-5 through Polio-8). The greatest loss of data for cell culture and stool  
237 specimens was due to removal of duplicate sequences (Figure 2B-D), except in the  
238 case of samples sequenced on the Ion Torrent PGM platform (PD6, PD8), where  
239 removal of low quality/short reads led to the greatest loss of data (Table S7,  $p < 0.0001$ ).  
240 The proportion of duplicate reads removed was greater for samples sequenced on  
241 standard Illumina 500 v2 runs (MK5, MN5) compared to Illumina Nano 500 v2 runs  
242 (MKN, MNN) and Ion Torrent S5 runs (SDS, SDG) (Table S8,  $p < 0.0001$ ).

243 Because of the increase in read duplication with sequencing depth, the proportion of  
244 viral (i.e., target) reads did not scale linearly with sequencing output. Rather, datasets  
245 with intermediate sequencing output (MKN, SDG and SDS) tended to have a higher  
246 proportion of viral reads per sample (Figure 3A). Regardless of whether duplicate reads

247 were considered, the greatest proportion of viral reads were observed for polio samples  
248 (Figure 3B), whereas low sequencing yields were obtained for EV-D68 samples despite  
249 the high titer of virus measured in the original specimens (Ct values of 17 to 21.6 using  
250 an EV-D68-specific qPCR assay, Table S1). Illumina datasets prepared using the Kapa  
251 HyperPlus Kit (MKN, MK5) and datasets generated using the Ion Torrent S5 platform  
252 (SDG, SDS) consistently produced the highest proportion of target reads for norovirus  
253 and EV-D68 samples, respectively (Figures 3A and 3B). For norovirus samples, where  
254 specimens comprised a larger span of Ct values (from 18 to 27 using a norovirus-  
255 specific qPCR assay), a general trend of decreasing target reads with increasing Ct was  
256 observed (Figure S1). However, when comparing EV-D68 and sapovirus samples,  
257 which had a narrower distribution of Ct value, there was no obvious correlation between  
258 Ct and the amount of target sequence data obtained (Figure S1). For example, only 0.1-  
259 0.6% of reads mapped to Sapo-16 (Figure 3), which had a relatively low Ct value of  
260 18.9.

261

## 262 **Comparison of Genome Coverage**

263 When trying to generate genome sequences, the breadth of coverage (i.e., percentage  
264 of positions in a genome which are sequenced), as well as the depth of coverage (i.e.,  
265 number of reads covering a given position in the genome) influence the completeness  
266 and accuracy of genome sequences produced (30). Considering the breadth of  
267 coverage across target viruses (Figure 4), at  $\geq 1X$  read coverage the Ion Torrent S5  
268 datasets (SDG, SDS) generated the most consistent coverage for EV-D68 genomes,

269 while the MK5 dataset produced the greatest breadth of coverage for norovirus  
270 samples. Ion Torrent S5 and Illumina MiSeq datasets all performed well for sequencing  
271 of poliovirus; for parechovirus samples, the breadth of genome coverage was within 10  
272 bp of the master consensus length for all datasets. If only genome positions with  $\geq 10X$   
273 read coverage were considered for calculating the breadth of coverage, the MK5  
274 dataset covered the greatest proportion of the genome for 14 of the 18 viruses  
275 sequenced (Figure 4).

276

277 Considering the pattern of sequencing coverage across a genome, reproducible peaks  
278 in the coverage profiles were observed, as shown for poliovirus samples for example  
279 (Figure 5). Despite uneven coverage profiles produced by the SISPA protocol (31-33), a  
280 relatively small number of reads (compared to bacterial or eukaryotic genomes) was  
281 needed to reconstruct near-complete genomes (approximately 30,000 reads to obtain at  
282 least single read coverage across  $>99\%$  of the genome, or  $\geq 10X$  read coverage across  
283  $>98\%$  of the genome, for viruses with  $\sim 7.3$ - $7.5$  kb genomes, Figures S2 and S3). While  
284 all datasets compared produced statistically similar coverage patterns, libraries  
285 prepared using the same library preparation kit had a stronger correlation, particularly  
286 for MiSeq libraries prepared using the Nextera XT kits (MNN and MN5) and Kapa  
287 HyperPlus kit (MKN and MK5) (Dataset S1,  $p < 0.0001$ ). For Ion Torrent PGM datasets,  
288 PD6 coverage patterns were consistently most similar to PD8. Interestingly, PD8  
289 datasets were also very similar to SDS datasets, with PD8 datasets demonstrating the  
290 strongest correlation to SDS datasets for 10 of 14 viruses with sufficient coverage for

291 comparison (Supplemental Dataset S1). The E-gel size selection (prior to library  
292 pooling) may have influenced the final distribution of fragment sizes, leading to  
293 differences in the coverage patterns between SDG and SDS datasets.

294

## 295 **Accuracy of Viral Consensus Genome Sequences**

296 Indels were observed in genome consensus sequences generated from Ion Torrent  
297 datasets, even in areas with high read coverage. Indels (insertions) in Ion Torrent S5  
298 datasets were observed in two locations for Polio-5 and Polio-6 samples, and one  
299 location for Polio-7 and Polio-8 samples (Figure 5). These locations correspond to  
300 homopolymer runs of seven or eight C residues for poliovirus type 1, and a  
301 homopolymer run of six A residues for poliovirus type 3 (Table S9). At some positions,  
302 an indel was observed in only one of the two Ion Torrent S5 datasets (SDS or SDG). In  
303 these scenarios, the indel frequency was still high for both datasets, but only one  
304 exceeded the 50% threshold where an indel would be called in the final majority  
305 consensus. Indels in consensus sequences were also observed in Ion Torrent datasets  
306 for norovirus, parechovirus, and sapovirus samples (Table S9). While indels for SDS  
307 and SDG sequences were always single-nucleotide insertions at areas of homopolymer  
308 repeats, indels detected in PD6 and PD8 consensus sequences did not always occur at  
309 repeat regions and were often deletions rather than insertions.

310

## 311 **Cost Analysis**

312 The calculated cost per sample decreased substantially with increased levels of  
313 multiplexing, particularly at moderate levels of multiplexing (Figure 6). As multiplexing  
314 levels were increased, the cost per sample reached a plateau, since certain reagent  
315 costs will always scale linearly with the number of samples processed. This includes the  
316 cost of pretreatment, reverse transcription, library preparation, and nucleic acid  
317 quantitation/quality control consumables (Table S10). The total cost per sample when  
318 sequencing 16 samples on an Illumina MiSeq 500V2 Nano run was \$76.25 and \$81.07  
319 using the Nextera XT and Kapa HyperPlus kits, respectively, compared to \$129.38 and  
320 \$134.20 when sequencing on a standard Illumina MiSeq 500V2 run. The cost per  
321 sample for an Ion Torrent S5 510 chip run closely matched the cost per sample of an  
322 Ion Torrent PGM 318v2 run (\$124.18 and \$125.04 respectively when sequencing 16  
323 samples, Figure 6), with the S5 510 chip producing more high quality reads with a  
324 shorter run time than the PGM 318 chip (Figure 2, Table S4) (34). When comparing the  
325 Ion Torrent S5 and the Illumina MiSeq system, the difference in the cost per sample  
326 decreases with increased multiplexing. For example, when sequencing only one  
327 sample, the difference in cost per sample between an Ion Torrent S5 530 run and an  
328 Illumina MiSeq 500v2 run (MK5 preparation), which have roughly comparable read  
329 outputs, is \$65.88 (\$1352.08 vs \$1286.20), compared to \$5.47 (\$113.97 vs \$108.50)  
330 when multiplexing 24 samples. For lower read output runs (i.e., Ion Torrent S5 510 vs  
331 Illumina MiSeq 500v2 Nano), the cost per sample is markedly lower for the Illumina  
332 MiSeq 500v2 Nano (Figure 6).

333



## 334 **DISCUSSION**

335 Sixteen samples containing RNA viruses were multiplexed and sequenced using eight  
336 different combinations of library preparation and sequencing kits to evaluate the ability  
337 of each strategy to produce target viral genomes. Datasets with intermediate output  
338 (MKN, SDS, and SDG) were found to have the highest proportion of viral reads. While  
339 the number of target reads increased with the amount of data generated, the removal of  
340 a greater proportion of duplicate reads led to lower proportions of target reads in  
341 Illumina MiSeq 500 v2 runs (MK5, MN5). A similar finding was reported in a study  
342 optimizing methodologies for sequencing of human respiratory syncytial virus, with  
343 higher proportions of duplicate reads observed in the higher output Illumina NextSeq  
344 500 datasets compared to the MiSeq (35). This is most likely due to over-amplification  
345 of viral genomes during SISPA, combined with a greater probability with increasing  
346 sequencing depth of generating duplicate reads by chance, especially for small  
347 genomes (36). Even when duplicate reads are retained, differences in the proportion of  
348 target reads were observed between datasets. Libraries prepared using the Kapa  
349 HyperPrep kit consistently had the highest proportion of target reads for norovirus  
350 samples, while Ion Torrent S5 libraries consistently produced relatively more data for  
351 EV-D68 samples. For the Kapa HyperPrep libraries, the lower proportion of reads  
352 removed during the host removal and quality filtering stages may have contributed to  
353 higher yields of target reads. In addition, better breadth and depth of coverage was  
354 observed for samples prepared with the KAPA library kits compared to the Nextera XT  
355 kit. This was particularly prominent for caliciviruses, where even KAPA datasets with  
356 lower total read output had better breadth of genome coverage than Nextera XT

357 datasets (e.g., MKN, SDG, and SDS datasets vs. MNN, and MK5 vs MN5). The  
358 required tagmentation/fragmentation step in the Nextera XT protocol likely leads to a  
359 greater loss of coverage over genome termini due to sequence selection bias (37-39).

360

361 Indels were observed in eight consensus genomes for the Ion Torrent S5 datasets, and  
362 six consensus genomes for the Ion Torrent PGM datasets. It is well documented that  
363 the predominant base-call error produced by Ion Torrent semiconductor sequencing  
364 platforms is indels, particularly after long homopolomeric stretches (8, 16, 17, 40).  
365 Interestingly though, high-frequency indels observed in the PGM datasets (PD6, PD8)  
366 were almost always deletions rather than insertions, and were not typically associated  
367 with homopolymer repeats, in contrast to S5 datasets. A previous study examining error  
368 bias in Ion Torrent PGM data identified single-base high-frequency indel errors which  
369 were not associated with long homopolymer repeats and were unique to a single run  
370 (14). This observation is similar to the patterns observed in our Ion Torrent PGM  
371 datasets, where the location of high-frequency indels manifesting in genome consensus  
372 sequences were usually only observed in one of the two PGM datasets. The disparity in  
373 the location and nature of high frequency indels between the Ion Torrent PGM and S5  
374 platforms suggests that there may be differences in the flow-value accuracy and  
375 resultant error profiles for these two Ion Torrent devices. While indels can be corrected  
376 for viruses that are well-characterized, particularly for the S5 dataset where indels were  
377 only observed in regions of homopolymer repeats of the same nucleotide, they may  
378 pose a challenge for genome sequencing of novel or relatively uncharacterized viruses.

379

380 When designing NGS experiments, the choice of multiplexing level and sequencing kit  
381 (i.e., the depth of sequencing per sample) will depend on the anticipated proportion of  
382 non-target (e.g., bacterial, human) reads relative to target, and the total number of  
383 samples which ultimately need to be sequenced for a given experiment. For example,  
384 poliovirus and other enteroviruses are known to shut down host RNA transcription early  
385 in infection, thus increasing the proportion of viral RNA relative to host RNA in virus  
386 isolates (41). Therefore, a greater number of enterovirus isolates can be multiplexed in  
387 one run— greater than 96 on a standard Illumina MiSeq or Ion Torrent S5 530 run for  
388 experiments with a large number of samples, or 24 samples on an Illumina MiSeq Nano  
389 or Ion Torrent S5 510 run for smaller experiments (21). Conversely, clinical samples  
390 have more variability in the proportion of target reads even when sequencing samples  
391 with similar qPCR Ct values. Additional factors such as the specimen type, the age of  
392 the specimen, the proportion of non-target nucleic acids (e.g. in a respiratory or fecal  
393 sample), and the stability of the pathogen being targeted likely influence whether  
394 complete genomes are obtained. For metagenomic sequencing directly from patient  
395 specimens such as stool, it is advisable to limit sequencing runs to 16-24 samples on a  
396 standard MiSeq or Ion Torrent 530/540 run. Even lower multiplexing levels (or  
397 sequencing kits with greater output) would be necessary for sequencing of EV-D68 from  
398 nasal swabs. In these situations, a targeted NGS method, such as generating EV-D68  
399 amplicons prior to library preparation and sequencing, is likely the most cost-effective  
400 option (42, 43). Ideally, researchers should strive to sequence as many samples as  
401 possible on a run, as multiplexing dramatically decreases the cost per sample.

402 Researchers may also decrease the cost through reducing library preparation reaction  
403 volumes, as this is typically the most costly step in NGS preparation (Table S10). While  
404 reducing reaction volumes deviates from the formulations validated by manufacturers,  
405 many researchers (including ourselves) have used half-reactions for preparing NGS  
406 libraries with no noticeable effect on quality, and other studies have reported reliable  
407 library preparation down to one-sixteenth reactions (44-47).

408

409 Our study has several limitations. While the reported results are broadly applicable to  
410 laboratories that sequence RNA viruses, only a subset of RNA viruses (picornaviruses  
411 and caliciviruses) were evaluated in this study. SISPA was used for random reverse  
412 transcription for all datasets which likely influenced the pattern of genome coverage to a  
413 greater degree than the library preparation or sequencing platform used. Despite the  
414 documented biases of SISPA, this method is still commonly used for RNA viruses,  
415 especially for samples where enrichment of RNA is necessary to obtain enough starting  
416 material for library construction (48). We also did not evaluate any targeted NGS  
417 methods, which are likely more effective when performing routine sequencing for  
418 particular viral pathogens (49). Nevertheless, this study complements previous research  
419 investigating the utility of Ion Torrent and Illumina platforms (8, 13, 17-19, 50-54). As  
420 more public health laboratories begin to implement NGS, these results provide  
421 important considerations in weighing the advantages and disadvantages of using a  
422 particular sequencing platform or library preparation kit for performing metagenomic  
423 sequencing of RNA viruses.

424

## 425 **Acknowledgements**

426 This work was made possible by Federal appropriations to the Centers for Disease  
427 Control and Prevention (CDC) through the Advanced Molecular Detection (AMD) line  
428 item. This research was also supported in part by appointments to the Research  
429 Participation Program at CDC administered by the Oak Ridge Institute for Science and  
430 Education (L.C.M., C.J.C., and M.D-V.) through an interagency agreement between  
431 CDC and the U.S Department of Energy.

432

433 We would like to thank Nikail Collins for her assistance with preparation of norovirus  
434 samples used in this study.

435

## 436 **Appendix A. Supplementary data**

437 Supplementary tables and figures: Supplement\_PlatformCompare\_JCM.pdf

438 Supplementary data set: DatasetS1\_SupplementalStatistics.xlsx

439

## 440 **References**

- 441 1. Metzker ML. 2010. Sequencing technologies - the next generation. *Nat Rev*  
442 *Genet* 11:31-46.
- 443 2. Barzon L, Lavezzo E, Costanzi G, Franchin E, Toppo S, Palu G. 2013. Next-  
444 generation sequencing technologies in diagnostic virology. *J Clin Virol* 58:346-50.

- 445 3. Heather JM, Chain B. 2016. The sequence of sequencers: The history of  
446 sequencing DNA. *Genomics* 107:1-8.
- 447 4. Koser CU, Ellington MJ, Cartwright EJ, Gillespie SH, Brown NM, Farrington M,  
448 Holden MT, Dougan G, Bentley SD, Parkhill J, Peacock SJ. 2012. Routine use of  
449 microbial whole genome sequencing in diagnostic and public health  
450 microbiology. *PLoS Pathog* 8:e1002824.
- 451 5. Lefterova MI, Suarez CJ, Banaei N, Pinsky BA. 2015. Next-generation  
452 sequencing for infectious disease diagnosis and management: A report of the  
453 Association for Molecular Pathology. *J Mol Diagn* 17:623-34.
- 454 6. Perlejewski K, Popiel M, Laskus T, Nakamura S, Motooka D, Stokowy T,  
455 Lipowski D, Pollak A, Lechowicz U, Caraballo Cortes K, Stepien A, Radkowski M,  
456 Bukowska-Osko I. 2015. Next-generation sequencing (NGS) in the identification  
457 of encephalitis-causing viruses: Unexpected detection of human herpesvirus 1  
458 while searching for RNA pathogens. *J Virol Methods* 226:1-6.
- 459 7. Yozwiak NL, Skewes-Cox P, Stenglein MD, Balmaseda A, Harris E, DeRisi JL.  
460 2012. Virus identification in unknown tropical febrile illness cases using deep  
461 sequencing. *PLoS Negl Trop Dis* 6:e1485.
- 462 8. Loman NJ, Misra RV, Dallman TJ, Constantinidou C, Gharbia SE, Wain J, Pallen  
463 MJ. 2012. Performance comparison of benchtop high-throughput sequencing  
464 platforms. *Nat Biotechnol* 30:434-9.
- 465 9. Glenn TC. 2011. Field guide to next-generation DNA sequencers. *Mol Ecol*  
466 *Resour* 11:759-69.

- 467 10. Vincent AT, Derome N, Boyle B, Culley AI, Charette SJ. 2017. Next-generation  
468 sequencing (NGS) in the microbiological world: How to make the most of your  
469 money. *J Microbiol Methods* 138:60-71.
- 470 11. Brinkmann A, Ergunay K, Radonic A, Kocak Tufan Z, Domingo C, Nitsche A.  
471 2017. Development and preliminary evaluation of a multiplexed amplification and  
472 next generation sequencing method for viral hemorrhagic fever diagnostics.  
473 *PLoS Negl Trop Dis* 11:e0006075.
- 474 12. Neill JD, Bayles DO, Ridpath JF. 2014. Simultaneous rapid sequencing of  
475 multiple RNA virus genomes. *J Virol Methods* 201:68-72.
- 476 13. Clooney AG, Fouhy F, Sleator RD, A OD, Stanton C, Cotter PD, Claesson MJ.  
477 2016. Comparing apples and oranges?: Next generation sequencing and its  
478 impact on microbiome analysis. *PLoS One* 11:e0148028.
- 479 14. Bragg LM, Stone G, Butler MK, Hugenholtz P, Tyson GW. 2013. Shining a light  
480 on dark sequencing: characterising errors in Ion Torrent PGM data. *PLoS*  
481 *Comput Biol* 9:e1003031.
- 482 15. Meacham F, Boffelli D, Dhahbi J, Martin DI, Singer M, Pachter L. 2011.  
483 Identification and correction of systematic error in high-throughput sequence  
484 data. *BMC Bioinformatics* 12:451.
- 485 16. Speranskaya AS, Khafizov K, Ayginin AA, Krinitsina AA, Omelchenko DO, Nilova  
486 MV, Severova EE, Samokhina EN, Shipulin GA, Logacheva MD. 2018.  
487 Comparative analysis of Illumina and Ion Torrent high-throughput sequencing  
488 platforms for identification of plant components in herbal teas. *Food Control*  
489 93:315-324.

- 490 17. Quail MA, Smith M, Coupland P, Otto TD, Harris SR, Connor TR, Bertoni A,  
491 Swerdlow HP, Gu Y. 2012. A tale of three next generation sequencing platforms:  
492 comparison of Ion Torrent, Pacific Biosciences and Illumina MiSeq sequencers.  
493 *BMC Genomics* 13:341.
- 494 18. Liu L, Li Y, Li S, Hu N, He Y, Pong R, Lin D, Lu L, Law M. 2012. Comparison of  
495 next-generation sequencing systems. *J Biomed Biotechnol* 2012:251364.
- 496 19. Salipante SJ, Kawashima T, Rosenthal C, Hoogestraat DR, Cummings LA,  
497 Sengupta DJ, Harkins TT, Cookson BT, Hoffman NG. 2014. Performance  
498 comparison of Illumina and ion torrent next-generation sequencing platforms for  
499 16S rRNA-based bacterial community profiling. *Appl Environ Microbiol* 80:7583-  
500 91.
- 501 20. Reyes GR, Kim JP. 1991. Sequence-independent, single-primer amplification  
502 (SISPA) of complex DNA populations. *Mol Cell Probes* 5:473-81.
- 503 21. Montmayeur AM, Ng TF, Schmidt A, Zhao K, Magana L, Iber J, Castro CJ, Chen  
504 Q, Henderson E, Ramos E, Shaw J, Tatusov RL, Dybdahl-Sissoko N, Endegue-  
505 Zanga MC, Adeniji JA, Oberste MS, Burns CC. 2017. High-throughput next-  
506 generation sequencing of polioviruses. *J Clin Microbiol* 55:606-615.
- 507 22. Langmead B, Salzberg SL. 2012. Fast gapped-read alignment with Bowtie 2. *Nat*  
508 *Methods* 9:357-9.
- 509 23. Bankevich A, Nurk S, Antipov D, Gurevich AA, Dvorkin M, Kulikov AS, Lesin VM,  
510 Nikolenko SI, Pham S, Prjibelski AD, Pyshkin AV, Sirotkin AV, Vyahhi N, Tesler  
511 G, Alekseyev MA, Pevzner PA. 2012. SPAdes: a new genome assembly  
512 algorithm and its applications to single-cell sequencing. *J Comput Biol* 19:455-77.



- 513 24. Altschul SF, Gish W, Miller W, Myers EW, Lipman DJ. 1990. Basic local  
514 alignment search tool. *J Mol Biol* 215:403-10.
- 515 25. Kearse M, Moir R, Wilson A, Stones-Havas S, Cheung M, Sturrock S, Buxton S,  
516 Cooper A, Markowitz S, Duran C, Thierer T, Ashton B, Meintjes P, Drummond A.  
517 2012. Geneious Basic: an integrated and extendable desktop software platform  
518 for the organization and analysis of sequence data. *Bioinformatics* 28:1647-9.
- 519 26. Swearingen CJ, Castro MSM, Bursac Z. 2012. Inflated Beta Regression: Zero,  
520 One, and Everything in Between, *Presented at SAS Global Forum 2012*, Paper  
521 325-2012.
- 522 27. Westfall PH, Tobias RD, Wolfinger RD. 2011. Multiple comparisons and multiple  
523 tests using SAS. SAS Institute.
- 524 28. Marine R, McCarren C, Vorrassane V, Nasko D, Crowgey E, Polson SW,  
525 Wommack KE. 2014. Caught in the middle with multiple displacement  
526 amplification: the myth of pooling for avoiding multiple displacement amplification  
527 bias in a metagenome. *Microbiome* 2:3.
- 528 29. Hussing C, Kampmann ML, Mogensen HS, Borsting C, Morling N. 2018.  
529 Quantification of massively parallel sequencing libraries - a comparative study of  
530 eight methods. *Sci Rep* 8:1110.
- 531 30. Sims D, Sudbery I, Ilott NE, Heger A, Ponting CP. 2014. Sequencing depth and  
532 coverage: key considerations in genomic analyses. *Nat Rev Genet* 15:121-32.
- 533 31. Parras-Molto M, Rodriguez-Galet A, Suarez-Rodriguez P, Lopez-Bueno A. 2018.  
534 Evaluation of bias induced by viral enrichment and random amplification  
535 protocols in metagenomic surveys of saliva DNA viruses. *Microbiome* 6:119.

- 536 32. Karlsson OE, Belak S, Granberg F. 2013. The effect of preprocessing by  
537 sequence-independent, single-primer amplification (SISPA) on metagenomic  
538 detection of viruses. *Biosecur Bioterror* 11 Suppl 1:S227-34.
- 539 33. Victoria JG, Kapoor A, Li L, Blinkova O, Slikas B, Wang C, Naeem A, Zaidi S,  
540 Delwart E. 2009. Metagenomic analyses of viruses in stool samples from children  
541 with acute flaccid paralysis. *J Virol* 83:4642-51.
- 542 34. Shin S, Kim Y, Chul Oh S, Yu N, Lee ST, Rak Choi J, Lee KA. 2017. Validation  
543 and optimization of the Ion Torrent S5 XL sequencer and OncoPrint workflow for  
544 BRCA1 and BRCA2 genetic testing. *Oncotarget* 8:34858-34866.
- 545 35. Goya S, Valinotto LE, Tittarelli E, Rojo GL, Nabaes Jodar MS, Greninger AL,  
546 Zaiat JJ, Marti MA, Mistchenko AS, Viegas M. 2018. An optimized methodology  
547 for whole genome sequencing of RNA respiratory viruses from nasopharyngeal  
548 aspirates. *PLoS One* 13:e0199714.
- 549 36. Head SR, Komori HK, LaMere SA, Whisenant T, Van Nieuwerburgh F, Salomon  
550 DR, Ordoukhanian P. 2014. Library construction for next-generation sequencing:  
551 overviews and challenges. *Biotechniques* 56:61-4, 66, 68, passim.
- 552 37. Chung CH, Walter MH, Yang L, Chen SG, Winston V, Thomas MA. 2017.  
553 Predicting genome terminus sequences of *Bacillus cereus*-group bacteriophage  
554 using next generation sequencing data. *BMC Genomics* 18:350.
- 555 38. Schirmer M, D'Amore R, Ijaz UZ, Hall N, Quince C. 2016. Illumina error profiles:  
556 resolving fine-scale variation in metagenomic sequencing data. *BMC*  
557 *Bioinformatics* 17:125.

- 558 39. Marine R, Polson SW, Ravel J, Hatfull G, Russell D, Sullivan M, Syed F, Dumas  
559 M, Wommack KE. 2011. Evaluation of a transposase protocol for rapid  
560 generation of shotgun high-throughput sequencing libraries from nanogram  
561 quantities of DNA. *Appl Environ Microbiol* 77:8071-9.
- 562 40. Laehnemann D, Borkhardt A, McHardy AC. 2016. Denoising DNA deep  
563 sequencing data-high-throughput sequencing errors and their correction. *Brief*  
564 *Bioinform* 17:154-79.
- 565 41. Chase AJ, Semler BL. 2012. Viral subversion of host functions for picornavirus  
566 translation and RNA replication. *Future Virol* 7:179-191.
- 567 42. Ng TF, Montmayeur A, Castro C, Cone M, Stringer J, Lamson DM, Rogers SL,  
568 Wang Chern SW, Magana L, Marine R, Rubino H, Serinaldi D, George KS, Nix  
569 WA. 2016. Detection and genomic characterization of enterovirus D68 in  
570 respiratory samples isolated in the United States in 2016. *Genome Announc* 4.
- 571 43. Joffret ML, Polston PM, Razafindratsimandresy R, Bessaud M, Heraud JM,  
572 Delpeyroux F. 2018. Whole Genome Sequencing of Enteroviruses Species A to  
573 D by High-Throughput Sequencing: Application for Viral Mixtures. *Front Microbiol*  
574 9:2339.
- 575 44. Lamble S, Batty E, Attar M, Buck D, Bowden R, Lunter G, Crook D, El-Fahmawi  
576 B, Piazza P. 2013. Improved workflows for high throughput library preparation  
577 using the transposome-based Nextera system. *BMC Biotechnol* 13:104.
- 578 45. Tan JA, Mikheyev AS. 2016. A scaled-down workflow for Illumina shotgun  
579 sequencing library preparation: lower input and improved performance at small  
580 fraction of the cost. *PeerJ Preprints* 4:e2475v1.

- 581 46. Baym M, Kryazhimskiy S, Lieberman TD, Chung H, Desai MM, Kishony R. 2015.  
582 Inexpensive multiplexed library preparation for megabase-sized genomes. *PLoS*  
583 *One* 10:e0128036.
- 584 47. Mayday MY, Khan LM, Chow ED, Zinter MS, DeRisi JL. 2019. Miniaturization  
585 and optimization of 384-well compatible RNA sequencing library preparation.  
586 *PLoS One* 14:e0206194.
- 587 48. Rosseel T, Van Borm S, Vandenbussche F, Hoffmann B, van den Berg T, Beer  
588 M, Hoper D. 2013. The origin of biased sequence depth in sequence-  
589 independent nucleic acid amplification and optimization for efficient massive  
590 parallel sequencing. *PLoS One* 8:e76144.
- 591 49. Kumar A, Murthy S, Kapoor A. 2017. Evolution of selective-sequencing  
592 approaches for virus discovery and virome analysis. *Virus Res* 239:172-179.
- 593 50. Qiu Y, Chen JM, Wang T, Hou GY, Zhuang QY, Wu R, Wang KC. 2017.  
594 Detection of viromes of RNA viruses using the next generation sequencing  
595 libraries prepared by three methods. *Virus Res* 237:22-26.
- 596 51. Frey KG, Herrera-Galeano JE, Redden CL, Luu TV, Servetas SL, Mateczun AJ,  
597 Mokashi VP, Bishop-Lilly KA. 2014. Comparison of three next-generation  
598 sequencing platforms for metagenomic sequencing and identification of  
599 pathogens in blood. *BMC Genomics* 15:96.
- 600 52. Junemann S, Sedlazeck FJ, Prior K, Albersmeier A, John U, Kalinowski J,  
601 Mellmann A, Goesmann A, von Haeseler A, Stoye J, Harmsen D. 2013. Updating  
602 benchtop sequencing performance comparison. *Nat Biotechnol* 31:294-6.

- 603 53. Pallen MJ. 2013. Reply to Updating benchtop sequencing performance  
604 comparison. *Nat Biotechnol* 31:296.
- 605 54. Li X, Buckton AJ, Wilkinson SL, John S, Walsh R, Novotny T, Valaskova I, Gupta  
606 M, Game L, Barton PJ, Cook SA, Ware JS. 2013. Towards clinical molecular  
607 diagnosis of inherited cardiac conditions: a comparison of bench-top genome  
608 DNA sequencers. *PLoS One* 8:e67744.
- 609

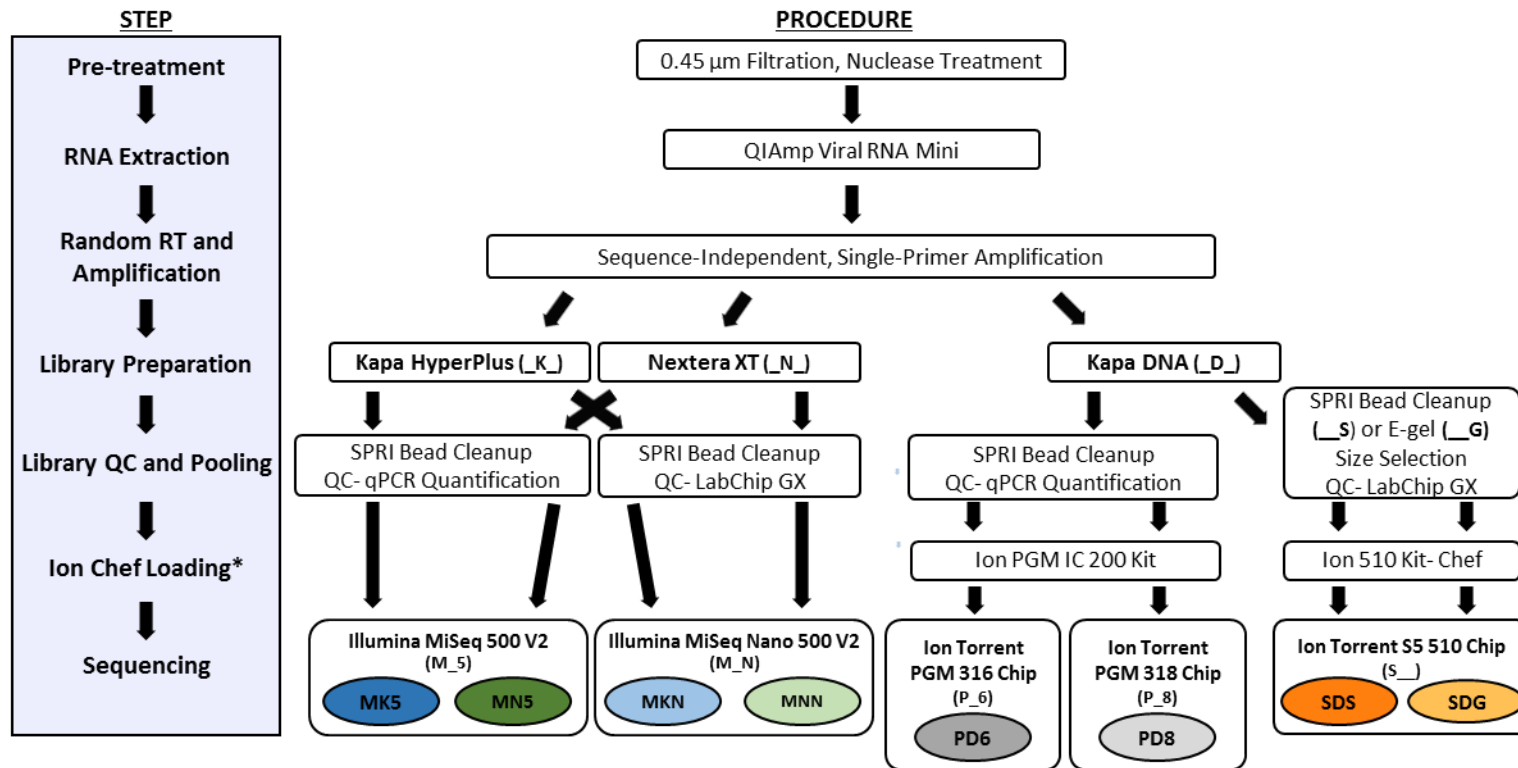

610

611 **Figure 1. Overview of library preparation and sequencing kits utilized for preparing viral specimens for sequencing on the Illumina, Ion Torrent PGM**  
 612 **and Ion Torrent S5 platforms.** Abbreviations for each dataset based on the type of library kit and sequencing kit/cartridge used: NexteraXT 500v2 (MK5),  
 613 NexteraXT Nano 500v2 (MNN), KAPA HyperPlus 500v2 (MK5), KAPA HyperPlus Nano 500v2 (MKN), KAPA DNA Ion Torrent 316v2 (PD6), KAPA DNA Ion  
 614 Torrent 318v2 (PD8), KAPA DNA Ion Torrent S5 510 SPRI Size Selection (SDS), KAPA DNA Ion Torrent. 510 E-Gel Size Selection (SDG). \*Ion Chef loading is  
 615 only performed for Ion Torrent sequencing runs.

616

617

618

619

620

621

622

623

624

625

626

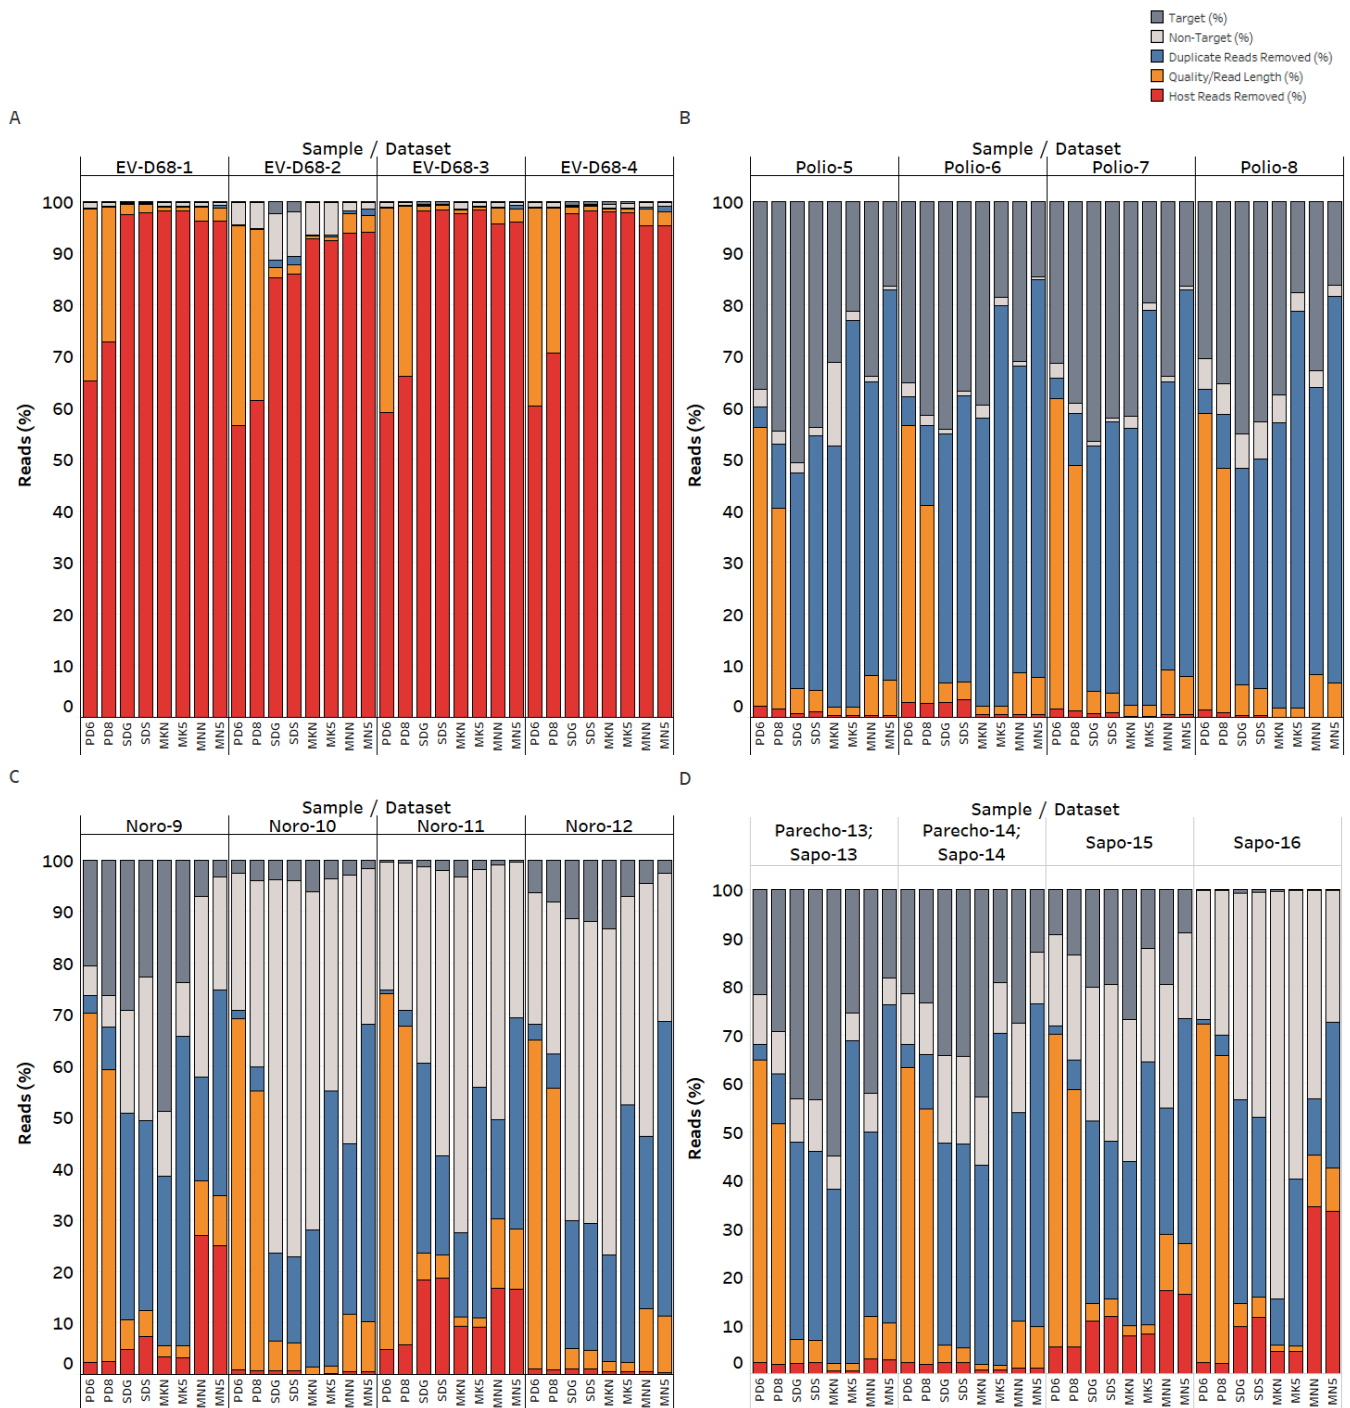

**Figure 2. Results of fastq quality filtering for each sample/dataset.** Samples are separated by target virus: EV-D68 1-4 (Panel A), polio 5-8 (Panel B), norovirus 9-12 (Panel C), and sapovirus/parechovirus 13-14 and sapovirus 15-16 (Panel D). The top label on the x-axis indicates the sample, while the bottom x-axis label indicates the NGS dataset. Each stacked bar represents the total reads per dataset. The percentage of reads removed at each filtering step is denoted by color, including the percentage of host/human reads removed (red), the proportion of sequences removed which were less than 50 bp after quality and adapter trimming (orange), and the proportion of duplicate reads removed (blue). Reads remaining after filtering are indicated by the gray bars,

627 with the light gray bars corresponding to non-target (i.e., non-viral) sequences and the dark gray bars  
628 corresponding to target viral sequences.



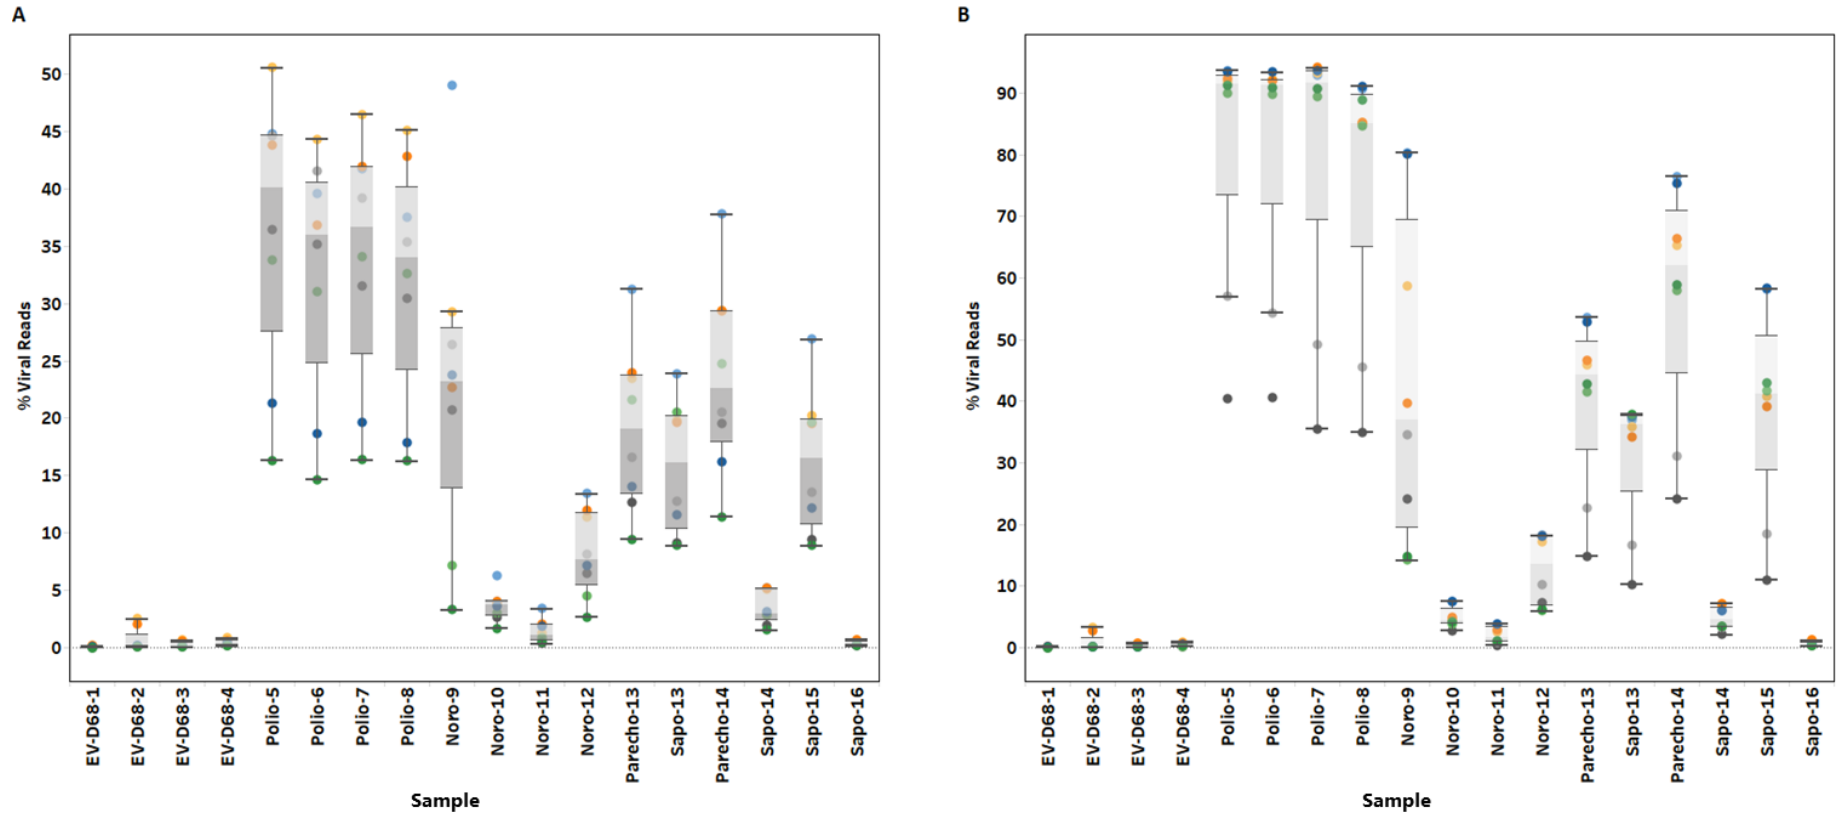

630

631 **Figure 3. The effect of library preparation and sequencing strategy on the proportion of viral (target) reads obtained for a given sample.** Each point  
 632 represents the percent viral reads for a given dataset, denoted by color. Box-and-whisker plots depict the range of percent viral reads for each sample.  
 633 Whiskers extend to 1.5 times the interquartile range. The grey zones indicates the upper and lower quartiles, and the line between the two quartiles  
 634 indicates the median percent target reads. Panel A depicts the analysis of the percentage of viral reads after all quality control filtering steps (see  
 635 Methods), whereas in Panel B, duplicate reads were considered in the analysis.

| Coverage   | Dataset |      |      |      |      |      |      |      |      |      |      |      |      |      |      |      |
|------------|---------|------|------|------|------|------|------|------|------|------|------|------|------|------|------|------|
|            | PD6     |      | MKN  |      | PD8  |      | SDG  |      | SDS  |      | MNN  |      | MK5  |      | MN5  |      |
|            | ≥1X     | ≥10X | ≥1X  | ≥10X | ≥1X  | ≥10X | ≥1X  | ≥10X | ≥1X  | ≥10X | ≥1X  | ≥10X | ≥1X  | ≥10X | ≥1X  | ≥10X |
| EV-D68-1   | -       | -    | 281  | 0    | 412  | 0    | 6916 | 2553 | 5597 | 347  | 70   | 0    | 3038 | 0    | 879  | 0    |
| EV-D68-2   | 519     | 0    | 4206 | 503  | 1671 | 0    | 7204 | 6829 | 7141 | 6879 | 3504 | 89   | 6948 | 5258 | 6354 | 3715 |
| EV-D68-3   | 670     | 0    | 4869 | 399  | 2918 | 0    | 7107 | 5494 | 7049 | 4151 | 2043 | 0    | 7164 | 5686 | 6332 | 1919 |
| EV-D68-4   | 1112    | 0    | 6597 | 2882 | 3255 | 65   | 7150 | 5932 | 7221 | 4890 | 5156 | 1285 | 7227 | 6926 | 6861 | 6011 |
| Polio-5    | 7302    | 7056 | 7428 | 7399 | 7344 | 7256 | 7434 | 7429 | 7434 | 7429 | 7433 | 7368 | 7434 | 7434 | 7434 | 7434 |
| Polio-6    | 7342    | 7273 | 7443 | 7335 | 7342 | 7325 | 7444 | 7443 | 7444 | 7403 | 7431 | 7342 | 7444 | 7437 | 7444 | 7441 |
| Polio-7    | 7397    | 7174 | 7417 | 7341 | 7351 | 7302 | 7417 | 7403 | 7417 | 7415 | 7417 | 7331 | 7417 | 7417 | 7417 | 7417 |
| Polio-8    | 7419    | 7171 | 7418 | 7379 | 7419 | 7375 | 7419 | 7417 | 7419 | 7416 | 7410 | 7368 | 7419 | 7419 | 7419 | 7418 |
| Noro-9     | 7500    | 7253 | 7532 | 7387 | 7500 | 7362 | 7454 | 7323 | 7498 | 7459 | 7420 | 7064 | 7546 | 7500 | 7497 | 7341 |
| Noro-10    | 7262    | 4502 | 7481 | 7243 | 7457 | 6896 | 7493 | 7163 | 7478 | 7231 | 7412 | 6856 | 7519 | 7473 | 7491 | 7454 |
| Noro-11    | 6222    | 1128 | 7465 | 6753 | 7280 | 5170 | 7419 | 6192 | 7431 | 5749 | 6950 | 4793 | 7536 | 7446 | 7483 | 7272 |
| Noro-12    | 7472    | 7128 | 7479 | 7330 | 7518 | 7438 | 7491 | 7476 | 7508 | 7412 | 7386 | 7136 | 7521 | 7499 | 7494 | 7465 |
| Parecho-13 | 7286    | 7228 | 7289 | 7254 | 7289 | 7277 | 7287 | 7277 | 7287 | 7278 | 7284 | 7267 | 7289 | 7286 | 7289 | 7286 |
| Sapo-13    | 7429    | 7169 | 7453 | 7355 | 7427 | 7365 | 7453 | 7415 | 7453 | 7416 | 7382 | 7267 | 7453 | 7428 | 7420 | 7403 |
| Parecho-14 | 7285    | 7139 | 7289 | 7242 | 7291 | 7274 | 7292 | 7291 | 7291 | 7279 | 7293 | 7233 | 7291 | 7288 | 7294 | 7286 |
| Sapo-14    | 7214    | 4531 | 7456 | 7310 | 7451 | 6999 | 7471 | 7442 | 7471 | 7374 | 7160 | 6939 | 7471 | 7455 | 7467 | 7310 |
| Sapo-15    | 7451    | 6547 | 7472 | 7398 | 7464 | 7350 | 7464 | 7385 | 7485 | 7396 | 7400 | 7254 | 7489 | 7472 | 7485 | 7456 |
| Sapo-16    | 5208    | 196  | 6101 | 1945 | 6505 | 1830 | 7116 | 4834 | 7142 | 5114 | 4106 | 1509 | 7094 | 6372 | 6899 | 5035 |

636

637

638

639

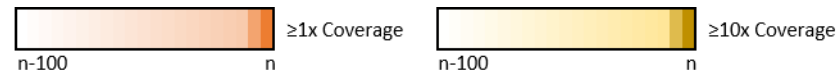

n= Dataset(s) with the greatest number of bases covered for a given sample

640

641

642

643

**Figure 4. Breadth of coverage across target genomes.** Heatmap indicating the total number of bases (genome positions) for each sample which had at least 1X read coverage and 10X read coverage per dataset. Cells highlighted in orange (for ≥1X coverage) and yellow (for ≥10X coverage) indicate datasets that were within 100 bp of the dataset with the greatest number of bases covered. Datasets with the greatest coverage for a given sample correspond to cells with the darkest color.

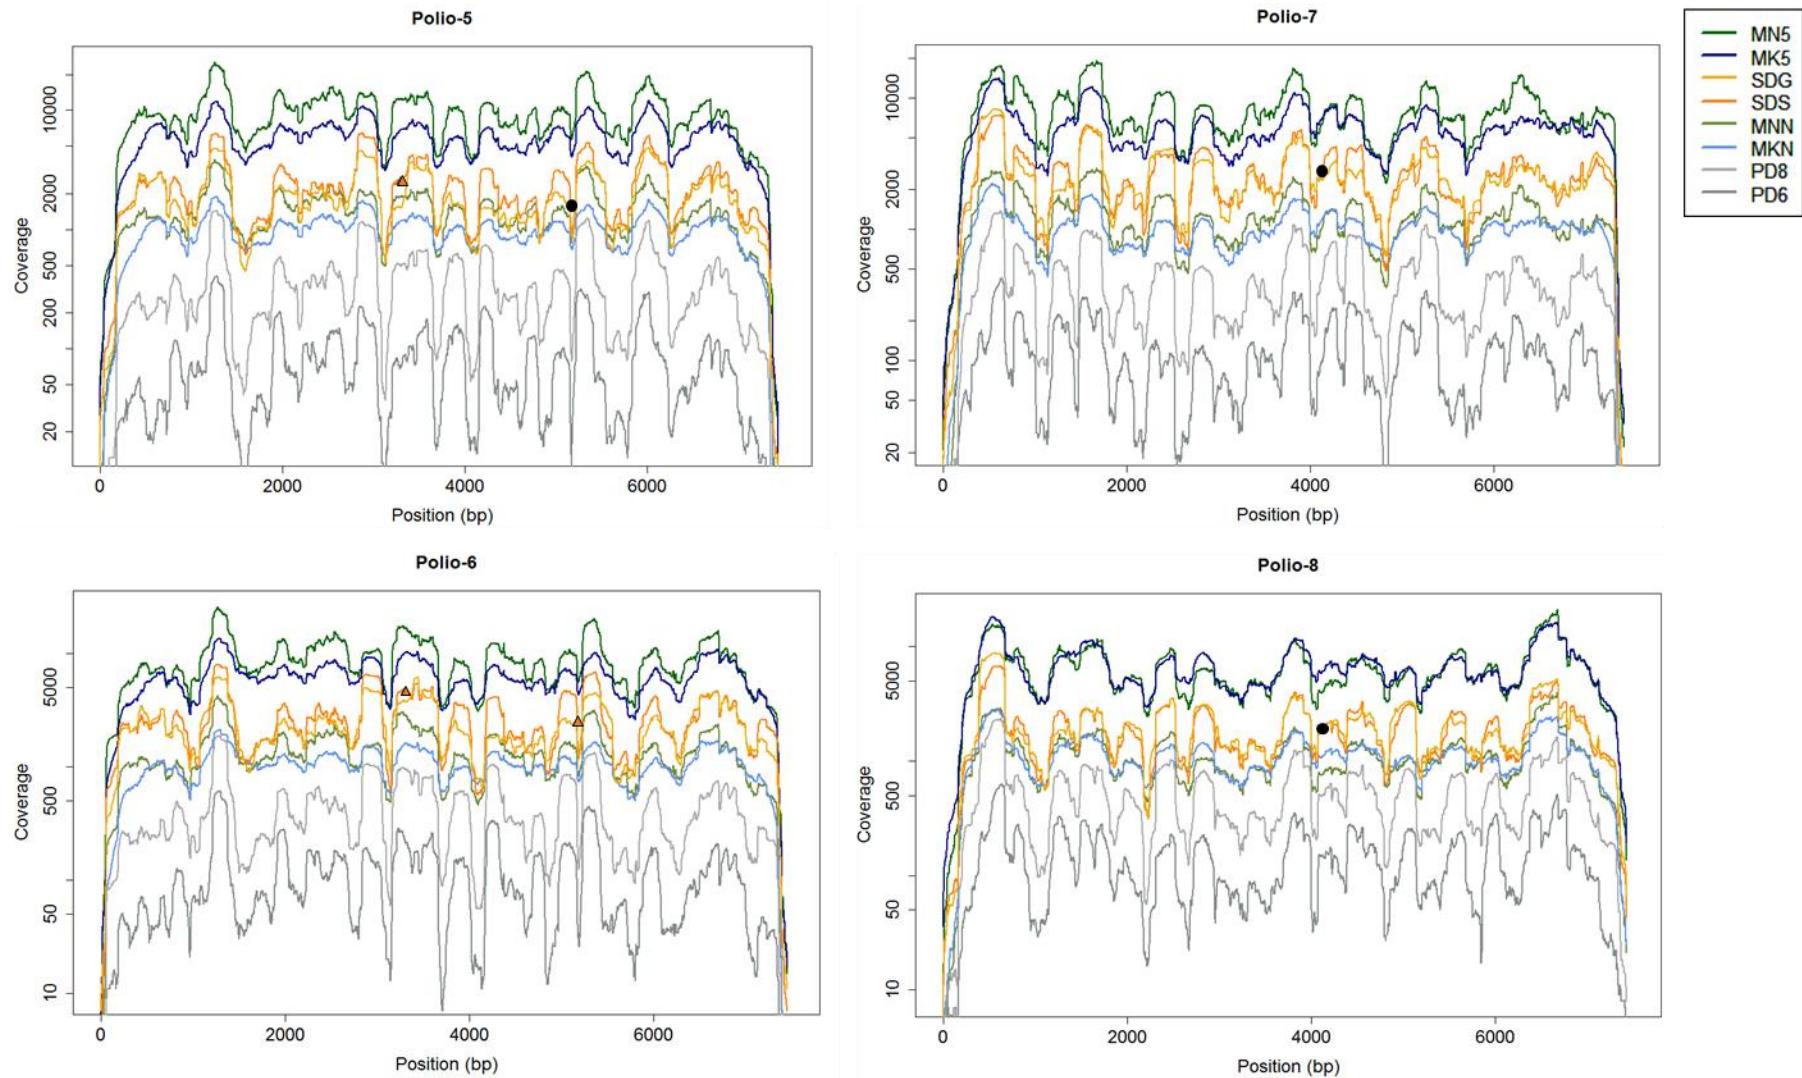

644  
 645 **Figure 5. Coverage patterns across the poliovirus genome.** The depth of coverage, plotted on a log scale, across the length of the genome is depicted  
 646 for all datasets (denoted by color). Polio-5 and Polio-6 are both type 1 polioviruses, while Polio-7 and Polio-8 are type 3 viruses. Orange triangles indicate  
 647 the positions of high frequency indels in the SDS consensus genome sequences, while black points indicate the positions of high-frequency indels found  
 648 at the same position for both SDG and SDS datasets (only one point per position is shown for simplicity).

649

650

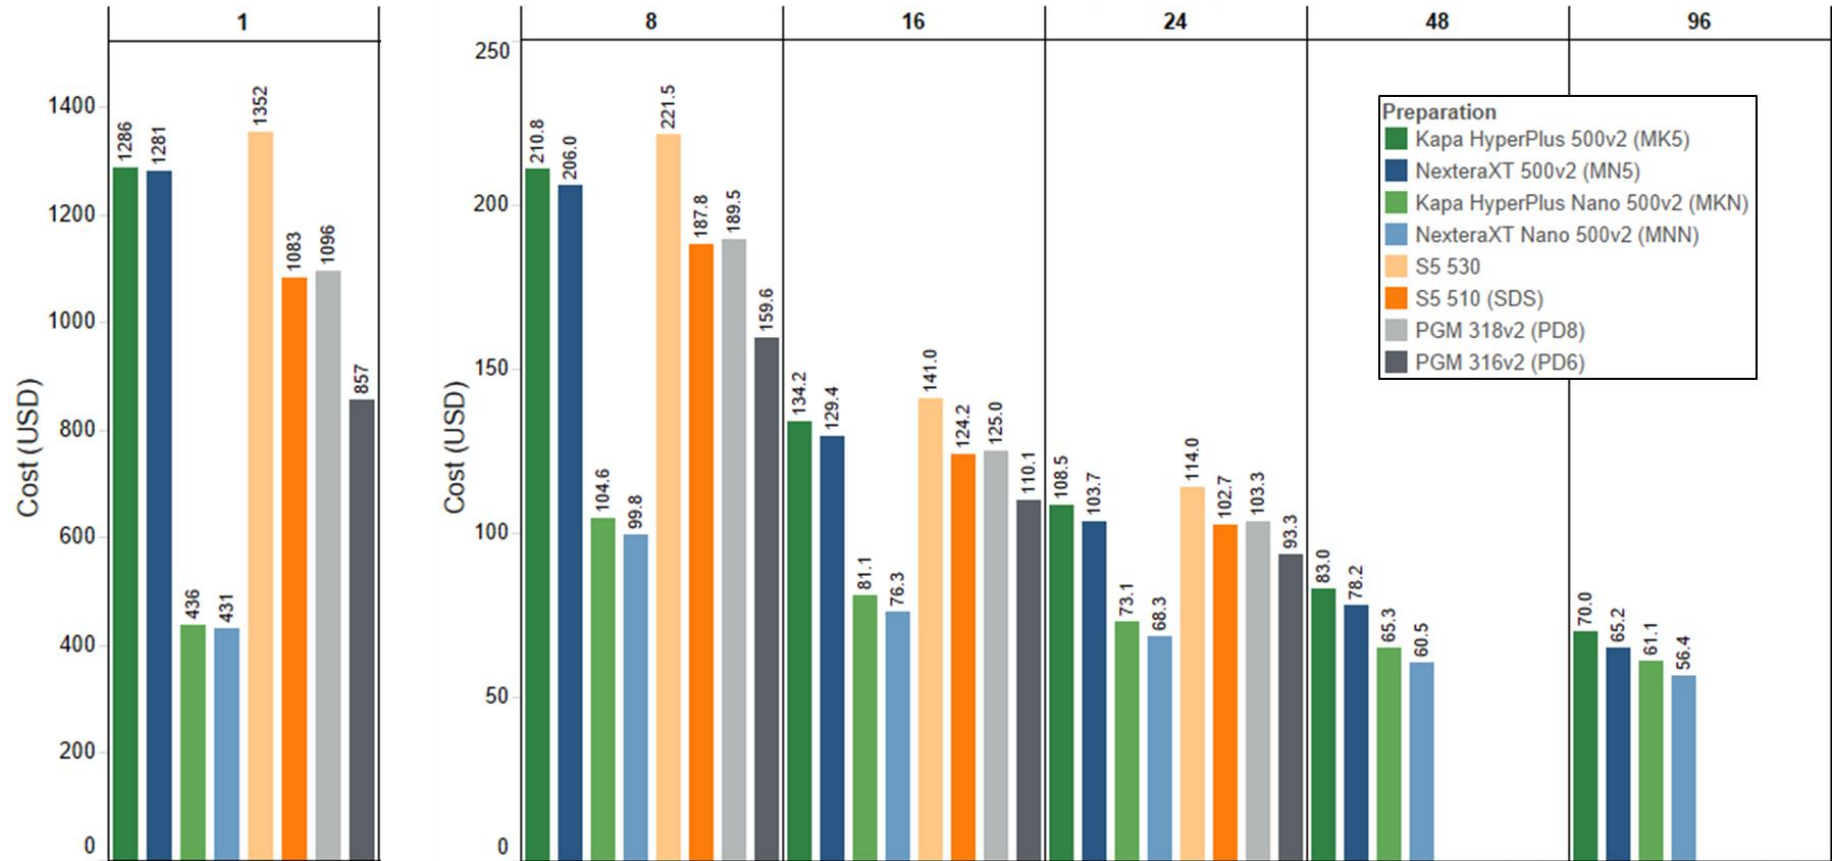

651

652

653

654

655

656

**Figure 6. Estimated cost per sample for performing next-generation sequencing based on kits used for sequencing and the level of multiplexing.** From left to right, each block represents the number of samples multiplexed in a single run. Individual bars correspond to the library preparation and sequencing kit used. The number above each bar indicates the estimated cost per sample. The Ion PGM and S5 calculations are only performed out to multiplexing levels of 24 samples, as the KAPA DNA library kit currently only makes 24 unique indices. Calculations include the cost of reagents, kits and consumables from sample pretreatment through sequencing (Fig. 1).

657
